# Supplementary material for: Identification and validation of three diagnostic autophagy-related genes associated with advanced plaques and immune cell infiltration in carotid atherosclerosis based on integrated bioinformatics analyses
Source: PeerJ journal article supplement (doi:10.7717/peerj.18543), 2024-11-22
Supplement: MIQE_checklist.xls [file MIQE_checklist.xls]

## Sheet: Sheet1
ITEM TO CHECK	IMPORTANCE	CHECKLIST
EXPERIMENTAL DESIGN
Definition of experimental and control groups	E	Line 125-128
Number within each group	E	Line 125-128
Assay carried out by core lab or investigator's lab?	D
Acknowledgement of authors' contributions	D
SAMPLE
Description	E	Line 122-125
Volume/mass of sample processed	D
Microdissection or macrodissection	E	Line 122-125
Processing procedure	E	Line 125-128
If frozen - how and how quickly?	E	Line 125-128
If fixed - with what, how quickly?	E	Line 125-128
Sample storage conditions and duration (especially for FFPE samples)	E	Line 125-128
NUCLEIC ACID EXTRACTION
Procedure and/or instrumentation	E	Line 139
Name of kit and details of any modifications	E	Line 140
Source of additional reagents used	D
Details of DNase or RNAse treatment	E	Line 139-140
Contamination assessment (DNA or RNA)	E	Line 139-140
Nucleic acid quantification	E	Line 139-140
Instrument and method	E	Line 139-140
Purity (A260/A280)	D
Yield	D
RNA integrity method/instrument	E	Line 139-140
RIN/RQI or Cq of 3' and 5' transcripts	E	Line 139-140
Electrophoresis traces	D
Inhibition testing (Cq dilutions, spike or other)	E	Line 139-140
REVERSE TRANSCRIPTION
Complete reaction conditions	E	Line 139-140
Amount of RNA and reaction volume	E	Line 139-140
Priming oligonucleotide (if using GSP) and concentration	E	Line 139-140
Reverse transcriptase and concentration	E	Line 139-140
Temperature and time	E	Line 139-140
Manufacturer of reagents and catalogue numbers	D
Cqs with and without RT	D*
Storage conditions of cDNA	D
qPCR TARGET INFORMATION
If multiplex, efficiency and LOD of each assay.	E	Line 141-142
Sequence accession number	E	Line 141-142
Location of amplicon	D
Amplicon length	E	Line 141-142
In silico specificity screen (BLAST, etc)	E	Line 141-142
Pseudogenes, retropseudogenes or other homologs?	D
Sequence alignment	D
Secondary structure analysis of amplicon	D
Location of each primer by exon or intron (if applicable)	E	Line 141-142
What splice variants are targeted?	E	Line 141-142
qPCR OLIGONUCLEOTIDES
Primer sequences	E	Line 143
RTPrimerDB Identification Number	D
Probe sequences	D**
Location and identity of any modifications	E	Line 143
Manufacturer of oligonucleotides	D
Purification method	D
qPCR PROTOCOL
Complete reaction conditions	E	Line 141
Reaction volume and amount of cDNA/DNA	E	Line 141
Primer, (probe), Mg++ and dNTP concentrations	E	Line 141
Polymerase identity and concentration	E	Line 141
Buffer/kit identity and manufacturer	E	Line 141
Exact chemical constitution of the buffer	D	Line 141
Additives (SYBR Green I, DMSO, etc.)	E	Line 141
Manufacturer of plates/tubes and catalog number	D
Complete thermocycling parameters	E	Line 141
Reaction setup (manual/robotic)	D
Manufacturer of qPCR instrument	E	Line 141
qPCR VALIDATION
Evidence of optimisation (from gradients)	D
Specificity (gel, sequence, melt, or digest)	E	Line 143
For SYBR Green I, Cq of the NTC	E	Line 143
Standard curves with slope and y-intercept	E	Line 143
PCR efficiency calculated from slope	E	Line 143
Confidence interval for PCR efficiency or standard error	D
r2 of standard curve	E	Line 143
Linear dynamic range	E	Line 143
Cq variation at lower limit	E	Line 143
Confidence intervals throughout range	D
Evidence for limit of detection	E	Line 143
If multiplex, efficiency and LOD of each assay.	E	Line 143
DATA ANALYSIS
qPCR analysis program (source, version)	E	Line 142-143
Cq method determination	E	Line 142-143
Outlier identification and disposition	E	Line 142-143
Results of NTCs	E	Line 142-143
Justification of number and choice of reference genes	E	Line 142-143
Description of normalisation method	E	Line 142-143
Number and concordance of biological replicates	D
Number and stage (RT or qPCR) of technical replicates	E	Line 142-143
Repeatability (intra-assay variation)	E	Line 142-143
Reproducibility (inter-assay variation, %CV)	D
Power analysis	D
Statistical methods for result significance	E	Line 178-180
Software (source, version)	E	Line 178-180
Cq or raw data submission using RDML	D
Table 1. MIQE checklist for authors, reviewers and editors. All essential information (E) must be submitted with the manuscript. Desirable
information (D) should be submitted if available. If using primers obtained from RTPrimerDB, information on qPCR target, oligonucleotides,
protocols and validation is available from that source.
*: Assessing the absence of DNA using a no RT assay is essential when first extracting RNA. Once the sample has been validated as
RDNA-free, inclusion of a no-RT control is desirable, but no longer essential.
**: Disclosure of the probe sequence is highly desirable and strongly encouraged. However, since not all commercial pre-designed assay
vendors provide this information, it cannot be an essential requirement. Use of such assays is advised against.
