# Supplementary material for: Identification and validation of three diagnostic autophagy-related genes associated with advanced plaques and immune cell infiltration in carotid atherosclerosis based on integrated bioinformatics analyses
Source: PeerJ journal article supplement (doi:10.7717/peerj.18543), 2024-11-22
Supplement: supplement_Table.xlsx [file supplement_Table.xlsx]

## Sheet: sheet1
Table S1 The forward and reverse primers for qRT-PCR.
Genes	Forward (5’-3’)	Reverse (3’-5’)
GAPDH	ACAACTTTGGTATCGTGGAAGG	GCCATCACGCCACAGTTTC
CCL2	GCCTCCAGCATGAAAGTCTC	CAGATCTCCTTGGCCACAAT
LAMP2	GAAAATGCCACTTGCCTTTATGC	AGGAAAAGCCAGGTCCGAAC
CTSB	AGAGTTATGTTTACCGAGGACCT	GATGCAGATCCGGTCAGAGA
Table S2 GO enrichment analysis of 41 differentially expressed autophagy-related genes.
ONTOLOGY	ID	Description	P-value	P-adjust	geneID	Count
BP	GO:0043280	positive regulation of cysteine-type endopeptidase activity involved in apoptotic process	2.09745e-10	3.09039e-07	CASP1/DLC1/BID/NLRC4/TNFSF10/CASP8/CTSD/BAX	8
BP	GO:0043281	regulation of cysteine-type endopeptidase activity involved in apoptotic process	3.59139e-10	3.09039e-07	BIRC5/CASP1/DLC1/BID/NLRC4/TNFSF10/CASP8/CTSD/BAX	9
BP	GO:2001056	positive regulation of cysteine-type endopeptidase activity	6.3012e-10	3.61479e-07	CASP1/DLC1/BID/NLRC4/TNFSF10/CASP8/CTSD/BAX	8
BP	GO:2000116	regulation of cysteine-type endopeptidase activity	1.01305e-09	4.35866e-07	BIRC5/CASP1/DLC1/BID/NLRC4/TNFSF10/CASP8/CTSD/BAX	9
BP	GO:0070997	neuron death	2.42504e-09	8.17598e-07	ATG7/NAMPT/RB1/BID/CASP8/BNIP3/CCL2/FOS/CX3CL1/BAX	10
BP	GO:0010950	positive regulation of endopeptidase activity	2.85043e-09	8.17598e-07	CASP1/DLC1/BID/NLRC4/TNFSF10/CASP8/CTSD/BAX	8
BP	GO:0010952	positive regulation of peptidase activity	6.06198e-09	1.41718e-06	CASP1/DLC1/BID/NLRC4/TNFSF10/CASP8/CTSD/BAX	8
BP	GO:0016236	macroautophagy	6.58769e-09	1.41718e-06	MTMR14/ATG7/BAG3/LAMP2/HSPB8/BNIP3/ATG16L2/ULK3/NPC1	9
BP	GO:0052548	regulation of endopeptidase activity	1.3472e-08	2.3498e-06	BIRC5/CASP1/DLC1/BID/NLRC4/TNFSF10/CASP8/SERPINA1/CTSD/BAX	10
BP	GO:0010506	regulation of autophagy	1.38438e-08	2.3498e-06	CASP1/ATG7/BAG3/NAMPT/BID/HSPB8/BNIP3/DRAM1/NPC1	9
CC	GO:0101002	ficolin-1-rich granule	2.64539e-09	4.31198e-07	GAA/CTSB/ATG7/LAMP2/LAMP1/SERPINA1/ARSB/CTSD	8
CC	GO:0005775	vacuolar lumen	1.16595e-06	7.41658e-05	GAA/CTSB/LAMP2/PRKCD/ARSB/CTSD	6
CC	GO:0043202	lysosomal lumen	1.36501e-06	7.41658e-05	GAA/CTSB/LAMP2/ARSB/CTSD	5
CC	GO:0045121	membrane raft	3.91168e-06	0.000124577	EGFR/LAMP2/DLC1/CASP8/RGS19/CTSD/NPC1	7
CC	GO:0098857	membrane microdomain	3.91168e-06	0.000124577	EGFR/LAMP2/DLC1/CASP8/RGS19/CTSD/NPC1	7
CC	GO:1904813	ficolin-1-rich granule lumen	4.58564e-06	0.000124577	CTSB/ATG7/SERPINA1/ARSB/CTSD	5
CC	GO:0005766	primary lysosome	1.36012e-05	0.000277124	GAA/LAMP2/LAMP1/PRKCD/ARSB	5
CC	GO:0042582	azurophil granule	1.36012e-05	0.000277124	GAA/LAMP2/LAMP1/PRKCD/ARSB	5
CC	GO:0005774	vacuolar membrane	2.4382e-05	0.000431917	GAA/LAMP2/LAMP1/DRAM1/CTSD/ATG16L2/NPC1	7
CC	GO:0001726	ruffle	2.6498e-05	0.000431917	MTMR14/EGFR/DLC1/NCKAP1/PTK6	5
MF	GO:0001618	virus receptor activity	1.79534e-05	0.00100849	CXCR4/EGFR/LAMP1/NPC1	4
MF	GO:0005126	cytokine receptor binding	1.81226e-05	0.00100849	BID/TNFSF10/CASP8/CCR2/CCL2/CX3CL1	6
MF	GO:0140272	exogenous protein binding	1.89092e-05	0.00100849	CXCR4/EGFR/LAMP1/NPC1	4
MF	GO:0004197	cysteine-type endopeptidase activity	0.000104269	0.00322135	CTSB/CASP1/CASP8/CTSD	4
MF	GO:0004714	transmembrane receptor protein tyrosine kinase activity	0.000122277	0.00322135	EGFR/ERBB2/PRKCD/PTK6	4
MF	GO:0048020	CCR chemokine receptor binding	0.000132494	0.00322135	CCR2/CCL2/CX3CL1	3
MF	GO:0032813	tumor necrosis factor receptor superfamily binding	0.000140934	0.00322135	BID/TNFSF10/CASP8	3
MF	GO:0004713	protein tyrosine kinase activity	0.00017458	0.00329939	EGFR/ERBB2/PRKCD/PTK6	4
MF	GO:0097199	cysteine-type endopeptidase activity involved in apoptotic signaling pathway	0.000185591	0.00329939	CASP1/CASP8	2
MF	GO:0019199	transmembrane receptor protein kinase activity	0.000211661	0.00338658	EGFR/ERBB2/PRKCD/PTK6	4
Table S3 KEGG enrichment analysis of 41 differentially expressed autophagy-related genes.
ID	Description	P-value	P-adjust	qvalue	geneID	Count
hsa04140	Autophagy - animal	1.54913e-09	2.32369e-07	1.32083e-07	MTMR14/CTSB/ATG7/LAMP2/LAMP1/PRKCD/BNIP3/CTSD/ATG16L2	9
hsa05163	Human cytomegalovirus infection	5.58014e-09	4.18511e-07	2.3789e-07	CXCR4/EGFR/EIF4EBP1/RB1/BID/CASP8/CCL2/BID6/CDKN2A/BAX	10
hsa04210	Apoptosis	2.74725e-08	1.37362e-06	7.80797e-07	BIRC5/CTSB/BID/TNFSF10/CASP8/CTSD/FOS/BAX	8
hsa01524	Platinum drug resistance	2.53522e-07	9.50707e-06	5.40402e-06	BIRC5/ERBB2/BID/CASP8/CDKN2A/BAX	6
hsa04142	Lysosome	4.65323e-07	1.39597e-05	7.93498e-06	GAA/CTSB/LAMP2/LAMP1/ARSB/CTSD/NPC1	7
hsa01522	Endocrine resistance	1.46723e-06	3.66807e-05	2.08501e-05	EGFR/ERBB2/RB1/FOS/CDKN2A/BAX	6
hsa04621	NOD-like receptor signaling pathway	4.67363e-06	0.000100149	5.69269e-05	CTSB/CASP1/NAMPT/NLRC4/CASP8/PRKCD/CCL2	7
hsa04215	Apoptosis - multiple species	5.61851e-06	0.000105347	5.98815e-05	BIRC5/BID/CASP8/BAX	4
hsa05223	Non-small cell lung cancer	6.51822e-06	0.000108637	6.17515e-05	EGFR/ERBB2/RB1/CDKN2A/BAX	5
hsa05212	Pancreatic cancer	8.51549e-06	0.000127732	7.26058e-05	EGFR/ERBB2/RB1/CDKN2A/BAX	5
